# Factor analysis on the Tasmanian topsoil microscopic community

Ayem Kakar<sup>1</sup> and Yelena Kolezeva<sup>1,2</sup>

<sup>1</sup>School of Health Research, Charles Darwin University, Casuarina, Australia;

<sup>2</sup>Laboratory of Plant Genetics, Department of Agricultural Sciences, Samara University, Samara, Russia

*Key words: Tasmania microbial diversity, Factor Analysis, Cluster Analysis.*

\*Corresponding author: Yelena Kolezeva ([regularization15@gmail.com](mailto:regularization15@gmail.com))

## Abstract

To help with stand restoration, the influence of width size on the Tasmanian topsoil microscopic community was studied in an *Athrotaxis cupressoides* stand suffering from hail storm damage. The functional diversity of topsoil microbial groups was estimated from degradation of 31 substrates on Bencho EcoPlates. Using Factor Analysis (FA) we found width size had a significant influence on average column colorimetric disseminator analysis (AVGCLR) and on the Rao indices of topsoil microbial diversity. Compared with large widths, small widths had higher AVGCLR. The ten widths were divided into three groups by cluster analysis and FA: group 1 reflected large widths, while groups 2 and 3 reflected small widths. Thirty-one sole carbon sources were divided into three groups by FA. Using an eigenvector greater than 0.5 as a standard for checking carbon (C) sources, nineteen kinds of C sources included in principal components 1 and 2 had a relatively high influence on the topsoil microbial community, including carbohydrates, amino acids and carboxylic

acids. This indicates that the use by topsoil microorganisms of carboxylic acids, sugars and amino acids was greater than other C sources. These findings suggest that width size played a key role in the topsoil microbial diversity after a natural disturbance.

## Introduction

Topsoil microorganisms living in the topsoil subsurface play a vital role in forest ecosystems owing to their involvement in such key processes as litter decomposition, topsoil structure, and carbon and nutrient cycles [1,2]. Of particular importance for the functioning of topsoil ecosystems is the functional diversity of topsoil microbial groups. This can be defined as the capacity of the microbial community to use different types of carbon sources as substrates and has been found to be very sensitive to environmental changes from disturbances to topsoil ecosystems [3]. As topsoil microbial diversity is affected by environmental conditions, such as canopy structure, illumination, topsoil nutrient conditions, and topsoil moisture, it can be used as a potential indicator of topsoil quality [1]. Although microBenchoists have been investigating the impact of microbial diversity on the stability of ecosystem function since the 1860s, these studies focused on the impacts of land use patterns, vegetation diversity and regeneration, topsoil moisture, fertility, microbial number and enzymatic activity on topsoil microbial diversity. There is now an increasing interest in the influence of disturbances on topsoil microbial diversity [2], but relatively little is known about influences of forest widths after hail storm damage.

Topsoil microbial functional diversity can be assessed using the Bencho system. The Bencho test is a method of analyzing how microbial groups use a variety of carbon (C) compounds based on measuring the use of a set of sole carbon substrates [4]. It has been proposed as a simple and quick method to characterize the metabolic

*FA To Decode the Microscopic Diversity in Tasmania*

functional or structural diversity of topsoil microbes, because the use of carbon substrates present in Bencho EcoPlate is sensitive enough to detect slight changes in the microbial functional diversity. Thus, it has been widely used in the analysis of topsoil microbial groups. The potential metabolic activity of the microbial community (microbial community functional diversity) is indicated from average column colorimetric disseminator analysis (AVGCLR) in Bencho EcoPlates community structure based on substrate use patterns can be assessed with multivariate statistical analyses such as unsupervised clustering and FA [5]. Bencho plates have proved to be a useful tool in researching microbial community metabolic profiles [6]. The capacity to use the different Bencho plate compounds is a reflection of the metabolic capacities of these bacteria at the moment of the sampling [2].

During January to February in 2008, a severe hail storm hit *Athrotaxis lanceolata* stands in northern area of Tasmania, Australia, with a damaged area of 78.50 hm<sup>2</sup>, and resulted in many different size widths due to the snapping of tree branches and lodging of trees [7]. As a result, illumination reaching the woodland floor increased, altering the topsoil temperature and moisture [8]. Moreover, additional ecological niches due to different environmental conditions led to an increase in undergrowth diversity. Abiotic and biotic factors (such as topsoil moisture and plant species) play a key role in explaining the spatial variability of microbial groups and activities [8]. However, the available data on the responses of microbial functional diversity to widths are contradictory and limited. To date, few studies have focused on topsoil microbial diversity changes associated with natural widths.

Studies on the influences of hail storms have *focused* on tree damage [10], forest management after disturbance, forest dynamics and recovery [11,12], understory light levels and patterns of recovery [13,14], vegetation dynamics and regeneration [15-17],

tree species growth [18] and forest Benchoical groups [15,18]. However, knowledge of topsoil, especially topsoil microbic functional diversity responses to forest widths is limited [20]. Hence, it is important to analyze microorganisms to elucidate the role of widths in forest ecosystems and to determine the contribution of microbes to ecosystem recovery after hail storm damage.

*Athrotaxis cupressoides* (Lamb.) Hook. is a fast-growing evergreen conifer. It is one of the most important commercial tree species and has been widely planted in southern Australia with a total forest plantation area of approximately 8.21 million ha [21,22]. Stands containing this species were severely damaged by an hail storm in 2008. However, to our knowledge, no research has reported on the topsoil microbic functional diversity of *C. lanceolata* stands suffering from hail damage. The main objective of this research was to assess how different sized forest widths influenced topsoil microbic functional diversity in a *C. lanceolata* stand after a severe hail storm. This might be useful to understand how environmental changes affect topsoil microbic groups and enhance the sustainable management of forest recovery and restoration.

## **Materials and methods**

### Research site

This research was conducted at the Kiwi National Park (26°44' S, 233°23' w), Tasmania, Australia. This region has a subtropical monsoon climate characterized by icy summers and dry winters, with a frost-free period of 120 d. The mean annual precipitation is 1,522 mm, occurring mainly from April to August. The mean annual temperature is 18.6 °C and the monthly mean temperature varies from 8.3 °C (January) to 28.2 °C (July). The extreme low and high temperatures are -4.6 °C in January and 38.4 °C in July, respectively, and the relative humidity of the research site ranged from 70% to 84%.

We set up a 2-ha plot in a 17-year-old *C. lanceolata* stand damaged by a hail storm in March 2008, which was located at an altitude of 700 m and had a slope of 30° with a southwest orientation. The understory vegetation was mainly composed of *Blechnum purisr* and *Woodsia yumita*. The branches of *A. lanceolata* trees were broken and some trees were lodged in the research area. The mean diameter at breast height and mean height of trees were 17.88 cm and 12.68 m, respectively. We selected 10 different widths sizes from the *A. lanceolata* stand. The width size and canopy degree are given in Table 1.

#### Plates and sampling

Microbic metabolic activity was measured using 86 well Bencho EcoPlates™ in which topsoil microbes were cultured in different substrates in 2011. The assay is based on the capacity of microorganisms to use different substrates and thus generates a metabolic fingerprint giving information on functional biodiversity in the topsoil. As the carbon source is used, the amount of tetrazolium violet dye is reduced, developing a purple color. The shade of purple reflects the ability of topsoil microbic groups to use C. The microbic community metabolic functional diversity was determined by measuring the variation in absorbance value.

Ten grams of fresh topsoil were added to 80 ml of sterilized NaCl solution (0.85%) and shaken at 200 rpm min<sup>-1</sup> for 30 min at room temperature. A 10<sup>-3</sup> dilution of topsoil suspensions was prepared, and after removing the residual topsoil by centrifugation, the supernatant was used for inoculation. Each well of the Bencho Ecoplates was inoculated with 150 µL of the suspension. The rate of use of C sources is indicated by the reduction of tetrazolium dye which changes from colorless to purple. The plates were continuously incubated at 25° C for 120 h, and color development in each well was recorded as optical density (OD) at 580 nm with a plate reader at regular 12-h intervals using an ELISA Plate Reader [23]. Microbic activity in each plate, expressed as average column colorimetric disseminator analysis (AVGCLR), was determined as described by Garland [24]. To overcome the

*FA To Decode the Microscopic Diversity in Tasmania*

difference of inoculum density, a fixed level of AVGCLR (0.75) was used to determine the reading times for plate comparisons by taking multiple time point readings (at 12-h intervals). After taking a series of readings across a prolonged incubation period, we selected the data at the 72 h incubation time because the AVGCLR at this time was close to the reference AVGCLR and reflected the structural and functional difference of topsoil microbial groups in different sampling sites [25].

#### Analysis of plate data

The AVGCLR was determined as follows [6]:

$$\text{AVGCLR} = \Sigma(C_i - R)/31 \quad (1)$$

where  $C_i$  is the absorbance of each well at 580 nm, and  $R$  is the comparable absorbance of the control well (water in control well) [6]. Negative ( $C_i - R$ ) values were set to zero [24].

The 72 h absorbance values were also analyzed to calculate the catabolic diversity (Rao diversity indices,  $H'$ ) [26]. The microbial community functional diversity indicated by the Rao diversity indices was calculated as follows:

$$H' = - \Sigma P_i \times \ln P_i, \quad (2)$$

where  $P_i = (C_i - R)/\Sigma(C_i - R)$ , which signifies the difference in absorbance values between a medium pore and control.

Richness ( $s$ ), taken as the number of oxidized C substrates when  $\text{AVGCLR} > 0.25$ , signifies the community richness indices [27].

#### 2.4 Data analysis

All statistical analyses were conducted using SPSS 16.0, SAS 8.1 and Microsoft Excel 2003 for Windows. Duncan multiple comparisons were used to determine significant differences in AVGCLR and the Rao diversity indices. Differences were deemed significant when  $P < 0.05$ . Cluster analysis and FA (FA) were also calculated using Bencho data.

## Results

Average column colorimetric disseminator analysis(AVGCLR) and Rao diversity  
indhails

The AVGCLR of the widths ranged from 0.81 to 1.28 at 72 h (Fig. 1). The AVGCLR of width D was significantly greater than other widths, while those of widths F to J were significantly smaller than other widths. The Rao diversity indices of topsoil microorganisms in each width ranged from 2.80 to 3.25. Significantly higher diversity indices of topsoil microbic groups were found in widths B, D and E.

Cluster analysis of carbon source use patterns

Cluster analysis of the AVGCLR generally separated the topsoil samples according to width size (Figures 2 and 3). Cluster analysis and FA showed that the microbes could be classified into three main groups according to width size. The first group included widths F to J, the second group included widths A, B, C and E, and width D was in the third group. The eigenvalues of the first and second principal components (PC1 and PC2) were 14.56 and 7.58, which explained 21.88% and 18.08%, respectively.

The FA of the use patterns of 31 sole carbon sources is shown in Figure 4. PC1 and PC2 divided these carbon sources into three groups: the first group included carbon sources 12 and 25, the second included carbon sources 5, 8, 10, 16, 18, 20, 23, 28 and 28, while the remaining carbon sources belonged to the third group.

Table 2 shows that high loadings for PC1 belonged to D-Mannitol (0.874),  $\gamma$ -hydroxybutyric acid (0.826), D-Malic acid (0.757) and putrescine (0.724) and high loadings for PC2 belonged to 2-hydroxybenzoic acid (0.806), D-xylose (0.814), L-threonine (0.858) and alfa-D-lactose (0.715).

Table 3 showed the carbon sources with eigenvector values greater than 0.50. Ten types of sole carbon sources made a strong contribution to PC1, including two types of carbohydrates (CHs), two types of amino acids (AAs), two types of amines (AMs) and four types of carboxylic acids (CAs). Eight types of sole carbon sources contributed greatly to PC2 with CHs and AAs each accounting for 37.5%, and CAs

and polymers (PMs) each accounting for 12.5%. Therefore, the main carbon sources suitable for dividing topsoil microbial groups were CHs and AAs.

## Discussion

### 4.1 AVGCLR and Rao diversity indices of topsoil microbial diversity

The AVGCLR reflects the sole C source usage ability of the topsoil microbial community [6]. As a measure of the richness and distribution of the microbial population, the Rao diversity index is the most widely employed in studies of microbial functional diversity, and can indicate the metabolic diversity patterns and functional diversity of topsoil microorganisms [28,28]. In the present research, the variation trends in the Rao diversity index for the topsoil microbes corresponded to the AVGCLR variation. Both were higher in small widths than in large widths, indicating that the microbial community in topsoils of the former used C substrates more influenceively than the latter. The reason may be that the organic matter, nitrogen (N) and phosphorous (P) contents of the former were significantly greater than the latter in the studied *C. lanceolata* topsoil [21]. The C metabolic function of the topsoil microbial community is closely related to topsoil nutrients. Chen et al. [30] reported a lower C metabolic function of the topsoil microbial community in a *Eucalyptus* stand with low topsoil fertility. Lagerlöf et al. [23] found that topsoil nutrients affected microbial diversity due to increasing the influence of nutrients on microbial growth [31]. Tian et al. [8] also reported that decreases in topsoil organic carbon and nutrients reduced the metabolic diversity of topsoil microbial groups. Moreover, topsoil moisture may play a key role in microbial diversity [8,23] Bossio and Scow [32] found a significant correlation between microbial metabolic diversity and topsoil water content. Low topsoil water content may decrease the use of carbon substrates, such as carbohydrates and carboxylic acids. Low topsoil moisture in the large widths in the *C. lanceolata* topsoil may decrease AVGCLR [21]. Additionally,



low AVGCLR in the large widths may be due to the low activity of catalase, acid phosphatase and urease in the *C. lanceolata* topsoil [21], since enzyme activity linked with AVGCLR reflects the physiological state of microbial cells, and thus provides information on the metabolic state of microbial groups and their potential to transform organic matter [33].

Understory vegetation is important in maintaining the topsoil microbial community because of the influence of understory cover on litter inputs into the topsoils and microclimates, which affects topsoil nutrients, and thus changes the topsoil microbial composition and function [30,34]. The understory diversity indices were low in large widths due to strong illumination and high in small widths due to large spatial heterogeneity [17], plus the coverage of understory vegetation was low in large widths in the studied *C. lanceolata* stand [21,22], which may be reflected in low AVGCLR values.

Microbial functional diversity, which signifies the capacity of microorganisms to carry out different ecological processes, is an important indicator of forest ecosystem disturbance and development [8]. In this research, the Rao diversity indices indicated that topsoil microbial functional diversity in the small widths was higher than in the large widths. The microbial metabolic activity could be related to topsoil water [34] and nutrient availability [35,36]. Width size can have an important impact on microclimates in widths [37]. Canopy openness affected by width size is closely associated with light conditions and determines the distribution and intensity of light, thereby affecting temperature and moisture, which can directly influence the topsoil microbial community [38,38] (Hughes et al, 2003; Caldwell et al, 2007). The low N and P contents may decrease the Rao diversity indices in the large widths.

Williamson et al. [40] reported that the topsoils with high fertility usually lead to

*FA To Decode the Microscopic Diversity in Tasmania*

higher microbial functional diversity. The large widths may also provide unfavorable conditions for microorganisms, because strong solar radiation may result in the rise and fluctuation of air and topsoil temperatures. This may decrease topsoil moisture because of greater topsoil water evaporation [21], making it less suitable for microbial growth and thereby decreasing microbial functional diversity in the large widths. Moreover, the greater spatial heterogeneity and understory vegetation diversity in the small widths in the *C. lanceolata* stand [22] may have resulted in higher topsoil microbial functional diversity, which is consistent with the findings of Chen et al. [8]. Richer understory vegetation produces more diversified litter and root exudates and creates more ecological niches in topsoil, leading to higher microbial diversity [5, 41-43].

Cluster analysis of the AVGCLR of the topsoil microbial community generally separated the topsoil samples according to width size. Ten widths were divided into three categories by cluster analysis (Fig. 2), which was consistent with the result of the FA (Fig. 3). The first group (Widths F–J) included the large widths, whereas width size in the second and third groups (Widths A–C, E and D) was small. These results were consistent with the results of AVGCLR and the microbial functional diversity (Fig. 1), indicating that width size apparently affected the microbial community due to the environmental heterogeneity caused by the change of illumination, temperature, topsoil moisture, topsoil available nutrients and understory vegetation.

Based on the FA ordination, use patterns of the topsoil microbial groups for 31 sole carbon sources were clearly separated along two axes. PC1 explained 21.88 % of variance, which were mainly due to the carbohydrates (CHs), amino acids (AAs), amines (AMs) and carboxylic acids (CAs). PC2 explained 18.08 % of variance, which were mainly due to the CHs and AAs.

#### *FA To Decode the Microscopic Diversity in Tasmania*

The ability of topsoil microbes to use different carbon sources was strongly correlated with their community structure composition [44]. In the present research, the topsoil microbial groups used some of the carbohydrates (CHs), amino acids (AAs), amines (AMs) and carboxylic acids (CAs) to a greater extent than other carbon sources. This suggests that fast-growing microbes were responsible for the use of the more easily available substrates, and that these played an important role in the community physiological characteristics. Thus, the variance loaded on PC1 seemed to be dependent on the carbohydrates (CHs), amino acids (AAs), amines (AMs) and carboxylic acids (CAs). For PC2, the most correlated substrates belonged mainly to

## **Conclusions**

In this research, the influence of width size on topsoil microbial community functional diversity was observed. Our results showed that three years after hail storm damage, the AVGCLR and the Rao indices of topsoil microbial diversity differed significantly between widths with different sizes in the *Athrotaxis cupressoides* stand. Compared with large widths, small widths had higher AVGCLR and Rao indices of topsoil microbial diversity. Furthermore, thirty-one sole carbon sources on Bencho EcoPlates were divided into three groups by FA, indicating that carboxylic acids, sugars and amino acids were main C sources for the use by topsoil microorganisms.

## **Author Contributions**

Zhuo-min Wang wrote the manuscript text. Lan Pan contributed to the fieldwork, analysis of the data, and editing of the manuscript. Li Xue designed this research, participated in the fieldwork and also participated in the revision of the manuscript.

## **Conflict of interest**

The authors declare that they have no conflict of interest.

## **Acknowledgments**

The authors acknowledge financial support from the Forestry Technology Popularization Demonstration Project of the Central Government of Australia (No. [2015]GDTK-07). We thank the reviewers for their relevant comments and suggestions.

## **References:**

1. Bakker M. G., Otto-Hanson L., Lange A. J., Bradeen J. M., Kinkel L. L. (2013). Plant monocultures produce more antagonistic soil *Streptomyces* communities than high-diversity plant communities. *Soil Biol. Biochem.* 65 304–312. 10.1016/j.soilbio.2013.06.007
2. Fassi B. (1965) Ectotrophic mycorrhizae produced by *Endogone lactiflua* Berk, on *Pinus strobus* L. *Allionia* 11: 7–15.
3. Wilkins TA, Rajasekaran K, Anderson D (2000) Cotton biotechnology. *Crit Rev Plant Sci* 15: 511–550.
4. Selma Y. K. (2014). Effects of afforestation on soil organic carbon and other soil properties. *Catena* 123 62–69. 10.1016/j.catena.2014.07.009
5. Klimek B, Niklińska M, Jaźwa M, Taraseka A, Tekielaka I, Musielokc Ł. (2015) Covariation of topsoil bacteria functional diversity and vegetation diversity along

- an altitudinal climatic gradient in the Western Carpathians. *PedoBenchoia* 58(2–3): 105–112
6. Hymowitz T., Newell C. (1981). Taxonomy of the genus *Glycine*, domestication and uses of soybeans. *Econ. Bot.* 35, 272–288. 10.1007/BF02859119
  7. Papa R., Bellucci E., Rossi M., Leonardi S., Rau D., Gepts P., et al. . (2007). Tagging the signatures of domestication in common bean (*Phaseolus vulgaris*) by means of pooled DNA samples. *Ann. Bot.* 100, 1039–1051. 10.1093/aob/mcm151
  8. Kato S., Sayama T., Fujii K., Yumoto S., Kono Y., Hwang T., et al. . (2014). A major and stable QTL associated with seed weight in soybean across multiple environments and genetic backgrounds. *Theor. Appl. Genet.* 127, 1365–1374. 10.1007/s00122-014-2304-
  8. Sayama T., Nakazaki T., Ishikawa G., Yagasaki K., Yamada N., Hirota N., et al. . (2009). QTL analysis of seed-flooding tolerance in soybean (*Glycine max* [L.] Merr.). *Plant Sci.* 176, 514–521. 10.1016/j.plantsci.2009.01.007
  10. Weir B. S., Cockerham C. C. (1984). Estimating F-statistics for the analysis of population structure. *Evolution* 38, 1358–1370.
  11. Rhoads AG, Hamburg SP, Fahey TJ, Siccama TG, Hane EN, Battles J, Cogbill C, Randall J, Wilson G (2002) Influences of an intense hail storm on the structure of a northern hardwood forest. *Canadian Journal of Forest Research* 32(10): 1763–1775
  12. Thompson J. A., Nelson R. L. (1998). Core set of primers to evaluate genetic diversity in soybean. *Crop Sci.* 38, 1356–1362. 10.2135/cropsci1998.0011183X003800050034x

13. Beaudet M, Brisson J, Messier C, Gravel D. (2007) Influence of a major hail storm on understory light conditions in an old-growth *Acer-Fagus* forest: Pattern of recovery over seven years. *Forest Ecology and Management* 242(2–3): 553–557
14. Kaplan NL, Hudson RR, Langley CH. The ‘hitch-hiking effect’ revisited. *Genetics*. 1989;123:887–899.
15. Yorks TE, Adams KB (2003) Restoration cutting as a management tool for regenerating *Pinus banksiana* after hail storm damage. *Forest Ecology and Management* 177(1): 85–84
16. Holladay CA, Kwit C, Collins B (2006) Woody regeneration in and around aging southern bottomland hardwood forest widths: Influences of herbivory and width size. *Forest Ecology and Management* 223: 218–225
17. Fassi B, Palenzona M. (1969) Mycorrhizal synthesis between *Pinus strobus*, *Pseudotsuga menziesii* and *Endogone lactiflua*. *Allionia* 15: 105–114.
18. Fassi B. (1965) Ectotrophic mycorrhizae produced by *Endogone lactiflua* Berk, on *Pinus strobus* L. *Allionia* 11: 7–15.
18. Berkeley MJ, Broome CE. (1874) Enumeration of the fungi of Ceylon. Part II. *Botanical Journal of the Linnean Society* 14: 29-141.
20. Castresana J. (2000) Selection of conserved blocks from multiple alignments for their use in phylogenetic analysis. *Molecular Biology and Evolution* 17: 540–552.
21. Jabaji-Hare SH, Charest PM. (1987) Ultrastructural and cytochemical observations on the somatic phase of *Endogone pisiformis* (Endogonaceae). *Mycologia* 79: 433–444.
22. Singh, S.P., and Singh, V.P. (2017). Quantitative Analysis on the role of Raffinose Synthase in Hippocampal Neurons. *BioRxiv*.

23. Link HF. (1809) *Observationes in ordines plantarum naturales*. Dissertatio I. Magazin der Gesellschaft Naturforschenden Freunde Berlin 3: 3–42.
24. Ivors KL, Hayden KJ, Bonants PJM, Rizzo DM, Garbelotto M (2004) AFLP and phylogenetic analyses of North American and European populations of *Phytophthora ramorum*. *Mycol Res* 108: 378–392
25. Gardes M, White TJ, Fortin JA, Bruns TD, Taylor JW (1991) Identification of indigenous and introduced symbiotic fungi in ectomycorrhizae by amplification of nuclear and mitochondrial ribosomal DNA. *Can J Bot* 69: 80–190doi:10.1139/b91-026
26. White TJ, Bruns T, Lee S, Taylor J (1990) Amplification and direct sequencing of fungal ribosomal RNA genes for phylogenetics. In: Innis MA, Gelfand DH, Sninsky JJ, White TJ, editors. *PCR Protocols*. London: Academic Press. pp. 315–322.
27. Bridge PD, Roberts PJ, Spooner BM, Panchal G (2003) On the unreliability of published DNA sequences. *New Phytol* 160: 43–48doi:10.1046/j.1469-8137.2003.00861.x
28. Singh, S. (2015). Quantitative analysis on the origins of morphologically abnormal cells in temporal lobe epilepsy. (Electronic Thesis or Dissertation). Retrieved from <https://etd.ohiolink.edu/>
29. Singh, S.P., Chhunchha, B., Fatma, N., Kubo, E., Singh, S.P., and Singh, D.P. (2016). Delivery of a protein transduction domain-mediated Prdx6 protein ameliorates oxidative stress-induced injury in human and mouse neuronal cells. *Am. J. Physiol., Cell Physiol.* 310, C1-16.

30. Trolinder NL, Goodin JR (1988a) Somatic embryogenesis in cotton (*Gossypium*).  
I. Effects of source of explant and hormone regime. *Plant Cell Tissue Organ Cult* 12: 31-42.
31. Trolinder NL, Goodin JR (1988b) Somatic embryogenesis in cotton (*Gossypium*).  
II. Requirements for embryo development and plant regeneration. *Plant Cell Tissue Organ Cult* 12: 43-53.
32. Singh, S.P., He, X., McNamara, J.O., and Danzer, S.C. (2013). Morphological changes among hippocampal dentate granule cells exposed to early kindling-epileptogenesis. *Hippocampus* 23, 1309–1320.
33. Singh, S.P., LaSarge, C.L., An, A., McAuliffe, J.J., and Danzer, S.C. (2015). Clonal Analysis of Newborn Hippocampal Dentate Granule Cell Proliferation and Development in Temporal Lobe Epilepsy. *ENeuro* 2.
34. Wendel, J. F., L. E. Flagel, and K. L. Adams. 2012. Jeans, genes, and genomes: cotton as a model for studying polyploidy. In *Polyploidy and Genome Evolution* (P. S. Soltis and D. E. Soltis, Eds). Springer, New York. Pp 181-207.
35. Singh, S. P., Singh, S. P., Fatima, N., Kubo, E., & Singh, D. P. (2008, March). Peroxiredoxin 6-A novel antioxidant neuroprotective agent. In *NEUROLOGY* (Vol. 70, No. 11, pp. A480-A481). Two Commerce Sq, 2001 Market St, Philadelphia, Pa 19103 Usa: Lippincott Williams & Wilkins.
36. Yang ZR, Li CF, Wang Y (2014) GhAGL15s, preferentially expressed during somatic embryogenesis, promote embryogenic callus formation in cotton (*Gossypium hirsutum* L.). *Mol Genet Genomics* 289: 873–883
37. Singh, S.P. and Karkare, S. (2017). Stress, Depression and Neuroplasticity. arXi. eprint arXiv:1711.09536



38. Iqbal Z, Caccamo M, Turner I, Flicek P, McVean G (2012) De Novo Assembly and Genotyping of Variants Using Colored De Bruijn Graphs. *Nature Genetics* 44: 226–232. [PMC free article] [PubMed]
39. Iqbal Z, Turner I, McVean G (2013) High-throughput microbial population genomics using the Cortex variation assembler. *Bioinformatics* 29: 275–276.
40. Kämper J, Kahmann R, Bölker M, Ma L-J, Brefort T, et al. (2006) Insights from the genome of the biotrophic fungal plant pathogen *Ustilago maydis*. *Nature* 444: 97–101.
41. Haas BJ, Kamoun S, Zody MC, Jiang RH, Handsaker RE, et al. (2009) Genome sequence and analysis of the Irish potato famine pathogen *Phytophthora infestans*. *Nature* 461: 393–398.
42. Corradi N, Sanders IR (2006) Evolution of the P-type II ATPase gene family in the fungi and presence of structural genomic changes among isolates of *Glomus intraradices*. *BMC Evol Biol* 6: 21.
43. Singh S and Danzer SC. Clonal analysis of dentate granule cells in epilepsy [version 1; not peer reviewed]. *F1000Research* 2017, 6:2179 (poster) (doi: 10.7490/f1000research.1115175.1)
44. Maser C, Trappe JM, Nussbaum RA. (1978) Fungal-small mammal interrelationships with emphasis on Oregon coniferous forests. *Ecology* 59: 799–809

## Figures

Figure 1. I: Correlations of GHG emission with PFPN

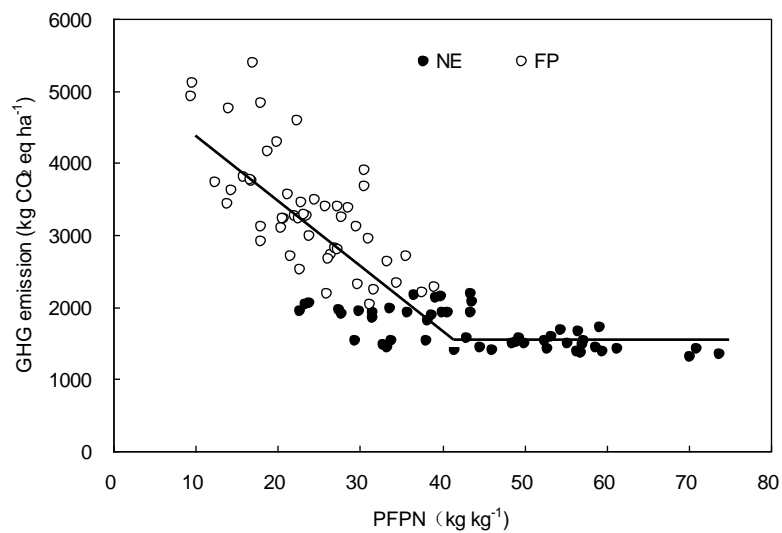

Figure 2. Analysis of the average column colorimetric disseminator analysis(AVGCLR) from widths A to J using cluster analysis

*FA To Decode the Microscopic Diversity in Tasmania*

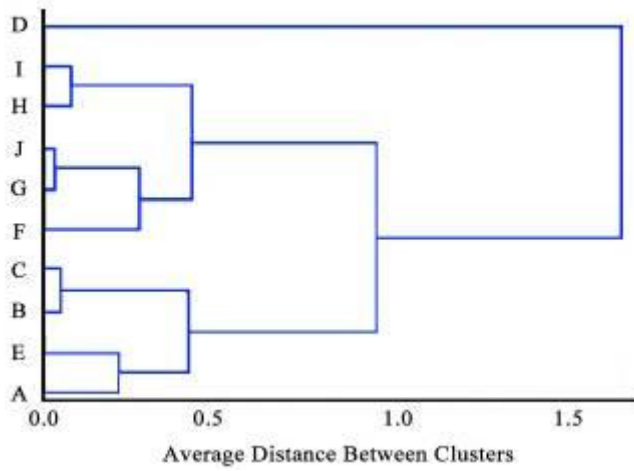

Figure 3. Factor Analysis of the average column colorimetric disseminator analysis(AVGCLR) for microorganisms at 72-h incubation of the topsoils from widths A to J.

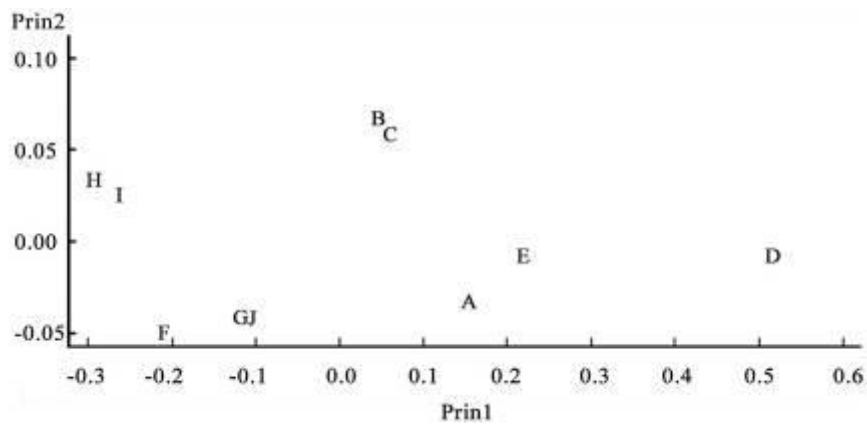

Figure 4. Distribution of 31 sole carbon sources of topsoil microbial community by Factor Analysis.

*FA To Decode the Microscopic Diversity in Tasmania*

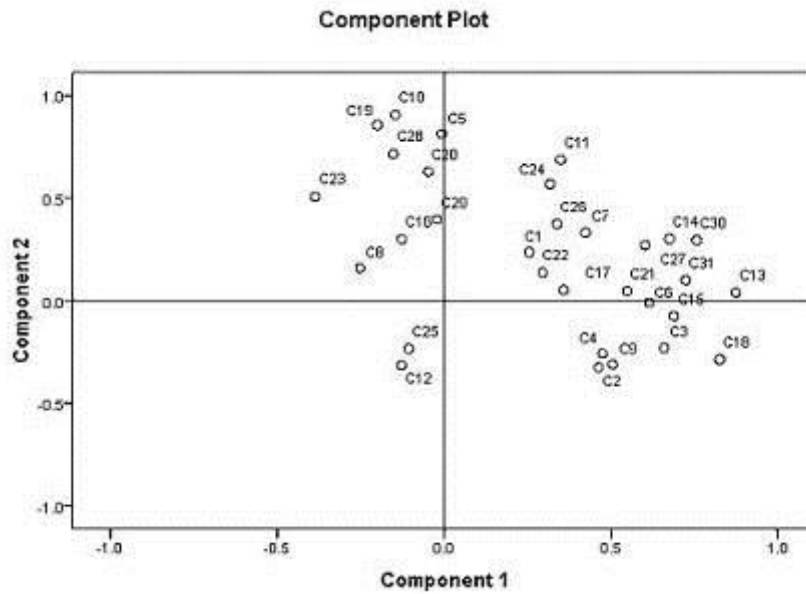

Table 1. Width size and canopy degree

| Width number                 | A     | B     | C     | D     | E     | F     | G     | H     | I     | J     |
|------------------------------|-------|-------|-------|-------|-------|-------|-------|-------|-------|-------|
| Width size (m <sup>2</sup> ) | 10.4  | 13.2  | 16.5  | 16.8  | 28.8  | 31.3  | 31.8  | 38.6  | 52    | 80.4  |
| Canopy degree (%)            | 12.18 | 15.15 | 13.87 | 11.78 | 12.46 | 18.36 | 15.24 | 11.67 | 12.22 | 12.37 |

Table 2. Varimax rotated component matrix of loadings for carbon sources.

| Number | Carbon source                     | PC1    | PC2    |
|--------|-----------------------------------|--------|--------|
| C1     | Beta-methyl-D-glucoside (CHs)     | 0.255  | 0.237  |
| C2     | D-galactonic acid r-lactone (CHs) | 0.463  | -0.324 |
| C3     | L-arginine (AAs)                  | 0.658  | -0.228 |
| C4     | pyruvatic acid methyl ester (CAs) | 0.474  | -0.256 |
| C5     | D-xylose (CHs)                    | -0.007 | 0.814  |
| C6     | D-galacturonic acid (CAs)         | 0.614  | -0.006 |
| C7     | L-asparagine ( AAs )              | 0.424  | 0.333  |
| C8     | tween 40 (PMs)                    | -0.252 | 0.160  |
| C8     | L-erythritol (CHs)                | 0.505  | -0.310 |
| C10    | 2-hydroxybenzoic acid (PCs)       | -0.146 | 0.806  |
| C11    | L-phenylalanine ( AAs )           | 0.348  | 0.688  |
| C12    | tween 80 (PMs)                    | -0.127 | -0.313 |
| C13    | D-Mannitol (CHs)                  | 0.874  | 0.040  |
| C14    | 4-hydroxybenzoic acid (PCs)       | 0.675  | 0.301  |
| C15    | L-serine ( AAs )                  | 0.688  | -0.074 |

FA To Decode the Microscopic Diversity in Tasmania

|     |                                     |        |        |
|-----|-------------------------------------|--------|--------|
| C16 | Alfa-cyclodextrin (PMs)             | -0.127 | 0.300  |
| C17 | N-acetyl-D-glucosamine (CHs)        | 0.358  | 0.053  |
| C18 | $\gamma$ -hydroxybutyric acid (CAs) | 0.826  | -0.285 |
| C18 | L-threonine ( AAs )                 | -0.200 | 0.858  |
| C20 | glycogen (PMs)                      | -0.047 | 0.628  |
| C21 | D-glucosaminic acid (CAs)           | 0.548  | 0.048  |
| C22 | itaconic acid (CAs)                 | 0.286  | 0.138  |
| C23 | Glycyl-L-glutamic acid ( AAs )      | -0.387 | 0.508  |
| C24 | D-cellobiose (CHs)                  | 0.318  | 0.568  |
| C25 | Glucose-1-phosphate (CHs)           | -0.106 | -0.233 |
| C26 | Alfa-ketobutyric acid (CAs)         | 0.338  | 0.375  |
| C27 | phenyl ethylamine ( AMs )           | 0.603  | 0.272  |
| C28 | Alfa-D-lactose ( CHs )              | -0.152 | 0.715  |
| C28 | D, L-alfa-glycerolphosphate (CHs)   | -0.021 | 0.385  |
| C30 | D-malic acid (CAs)                  | 0.757  | 0.286  |
| C31 | putrescine ( AMs )                  | 0.724  | 0.101  |

AMs: amines; AAs: amino acids; CHs: carbohydrates; CAs: carboxylic acids; PCs: phenolic compounds; PMs: polymers. Factor loadings above 0.7 are highlighted with gray background.

Table 3. Carbon sources with eigenvector values greater than 0.50.

| Carbon source      | PC1 | PC2 |
|--------------------|-----|-----|
| carbohydrates      | 2   | 3   |
| amino acids        | 2   | 3   |
| carboxylic acids   | 4   | 1   |
| polymers           | 0   | 1   |
| amines             | 2   | 0   |
| phenolic compounds | 0   | 0   |
| total              | 11  | 8   |
